# Supplementary material
Source: PubMed Central journal article supplement (PMC1323187)

A

|         |    | -----H1----- | --S1--                 | -----S2-----       | -----S3-----                      | --S4--      | *            |                     |     |
|---------|----|--------------|------------------------|--------------------|-----------------------------------|-------------|--------------|---------------------|-----|
| UbcH10  | 27 | ARGPVGKRLQ   | QELMTLMMSGDKGISAF      | PESD               | -----NLFKWVGTIHGAAGTVYEDLRYKLSLEF | PSGY        | PYNAPT       | VKFLTPCYHPNVDT      | 109 |
| hUbc9   | 1  | MSGIALSRLA   | QERKAWRKDHPFGFVAV      | PTKNPDGTMNLMNWECAI | PGKKGTPWEGGLFKLRMLFKDDY           | PSSPPKCK    | FEPPLFHPNVYP | 88                  |     |
| UbcH7   | 1  | --MAASRR     | LMKELEEIRKCGMKNFRNI    | QVDE               | -----ANLLTWQGLIVDPNP              | -PYDKGAFRIE | INFPAEY      | PFKPKITFKTKIYHPNIDE | 81  |
| hUbc13  | 1  | -MAGLP       | RRIIKETQRLLAEPVPGIKAEP | DES                | -----NARYFHVVIAGPQDSPFEGGT        | FKLELFLPEEY | PMAAPKVR     | FMTKIYHPNVDK        | 82  |
| scUbc2  | 1  | MSTPARR      | RLMRDFKRMKEDAPPGVSAS   | PLPD               | -----NVMVWNAMIIGPADTPYEDGT        | FRLLEFDEEY  | PNKPPHV      | KFLSEMFPNVYA        | 83  |
| scUbc13 | 1  | -MASLP       | KRIIKETEKLVSDPVPGITAE  | PHDD               | -----NLRYFQVTIEGPEQSPYEDGI        | FELELYLPDDY | PMEAPKVR     | FLTKIYHPNIDR        | 82  |
| scUbc4  | 1  | --MSSSK      | RIAKELSDLERDPPTSCSAG   | PVGD               | -----DLYHWQASIMGPADSPYAGGV        | FFLSIHFP    | TDYPFKPKI    | SFTTKIYHPNINA       | 81  |
| scUbc7  | 1  | MSKTAQ       | KRLLKELQQLIKDSPPGIVAG  | PKSE               | -----NNIFIWDCLIQPPDTPYADGV        | FNAKLEFPKDY | PLSPPKLT     | TFTPSILHPNIYP       | 84  |
| atUbc   | 1  | MSTPARK      | RLMRDFKRLQDPPAGISGAP   | QDN                | -----NIMLWNAVIFGPDDTPWDGGT        | FKLSLQFSE   | DYPNKPPT     | VRVSRMFHPNIYA       | 83  |
| UbcH5b  | 1  | ---MALK      | RIHKELNDLARDPPAQCSAG   | PVGD               | -----DMFHWQATIMGPNSPYQGGV         | FFLTIHF     | PTDYPFKPKV   | AFTRIYHPNINS        | 80  |

|         |     | *- 3 <sub>10</sub> -    | -----H2-----             | -----H3-----            | -----H4-----             |     |
|---------|-----|-------------------------|--------------------------|-------------------------|--------------------------|-----|
| UbcH10  | 110 | QGNICLDILK              | -----EKWSALYDVRTILLSIQSL | LGEPNIDSPLNTHAAELWKNP   | -TAFKKYLQETYSKQVTSQEP    | 179 |
| hUbc9   | 89  | SGTVCLSILEE             | -----DKDWRPAITIKQILLGIQ  | ELLNEPNIQDPAQAEAYTIYCQ  | NRVEYEKRVRAQAKKFAPS      | 158 |
| UbcH7   | 82  | KGQVCLPVISA             | -----ENWKPATKTDQVIQSLI   | ALVNDPQPEHPLRADLAE EYSK | DRKKFCKNAEEFTKKYGEKRPVD  | 154 |
| hUbc13  | 83  | LGRICLDILK              | -----DKWSPALQIRTVLLSIQ   | ALLSAPNPDDPLANDVAEQWKT  | NEAQAIETARAWTRLYAMNNI    | 152 |
| scUbc2  | 84  | NGEICLDILQ              | -----NRWTPTYDVASILTSIQ   | SLFNDPNPASPANVEAATL     | FKDHKSQYVKRVKETVEKSWEDD  | 155 |
| scUbc13 | 83  | LGRICLDVLK              | -----TNWSPALQIRTVLLSIQ   | ALLASPNPNDPLANDVAEDWIK  | NEQGAKAKAREWTKLYAKKKPE   | 153 |
| scUbc4  | 82  | NGNICLDILK              | -----DQWSPALTLSKVL       | SICSLTDANPDDPLVPEIA     | HIYKTDPRKYEATAREWTKKYAV  | 148 |
| scUbc7  | 85  | NGEVCISILHSPGDDPNMYELAE | ERWSPVQSVEKILLSVMSML     | SEPNIESGANIDACILWRDNR   | PEFERQVKLSILKSLGF        | 165 |
| atUbc   | 84  | DGSICLDILQ              | -----NQWSPIIDVAAILTSIQ   | SLLCDPNPNSPANSEAARMY    | SESKREYNRRVRDVVEQSWTAD   | 152 |
| UbcH5b  | 81  | NGSICLDILR              | -----SQWSPALTISKVLLS     | SICSLLCDPNPDDPLVPEI     | ARIYKTDREKYNRIAREWTQKYAM | 147 |

B

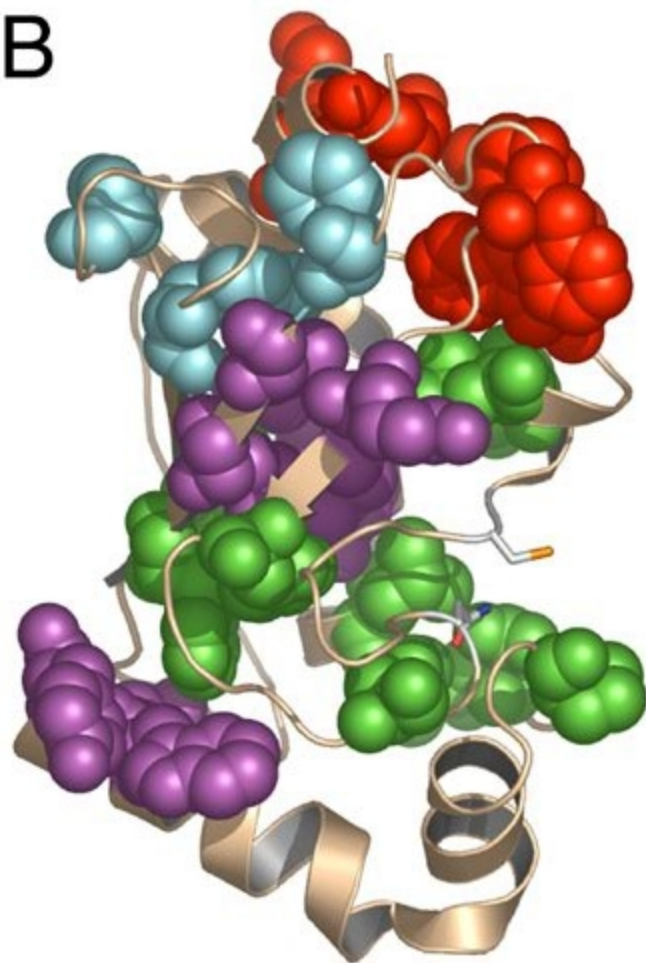

Supplement: pnas_0509418102_1.pdf [file pnas_0509418102_1.pdf]
